# Supplementary material for: Severity-dependent fronto-cingulate network compensation of immune-dependent caudate-insula dysconnectivity in bipolar II depression
Source: Research Square preprint supplement (doi:10.21203/rs.3.rs-8945790/v1), 2026-03-24
Supplement: Supplementary file 1 [file 94417963564e5d0145ff25d2.docx]

**IL-1β moderated caudate-insula dysconnectivity and severity-dependent mSFG-PCC compensation in bipolar II depression**

**Supplementary Materials**

**1. Supplementary Methods**

*1.1 The inclusion criteria of bipolar disorder type II depression (BDII-D) patients and HCs*

*1.2 Medication load calculation*

*1.3 Cytokine Measures*

*1.4 MRI data preprocessing*

**3. Supplementary Table 1-12**

**4. Supplementary Figure 1**

**5. Reference**

**Supplementary Methods**

***1. The inclusion criteria of bipolar disorder type II depression (BDII-D) patients and HCs***

The inclusion criteria of individuals with BDII were as follows: (1) ages from 15 to 65; (2) right-handedness; (3) met the DSM-5 criteria for BD type II during a depressive episode; (4) no MRI contraindication; (5) no anti-inflammatory medications in the past 4 weeks; (6) no history of electroconvulsive therapy within the last 12 months; (7) no comorbidity with the obsessive-compulsive disorder, panic disorder, axis-II psychiatric disorders, neurological disorder, alcohol/substance abuse, history of brain trauma, or pregnancy. The healthy controls (HCs) were recruited via posters and advertisements in the community and were screened by the Structured Clinical Interview for DSM-5 Nonpatient Edition to ensure that they were free of any psychiatric disorders. The inclusion criteria for HCs were as follows: (1) ages from 15 to 65; (2) right-handedness; (3) no current psychiatric illness screened by the Structured Clinical Interview for DSM-V Nonpatient Edition; (4) no MRI contraindication; (5) no history of psychiatric illness in first-degree relatives; (6) no current or past significant medical, neurological illness or chronic inflammatory disease; (7) not catching a cold or acute infection in the past 4 weeks.

***2. Medication load calculation***

We used a strategy developed by Hassel et al (1). for measuring total medication load in bipolar individuals by coding the dose of each antidepressant, mood stabilizer, antipsychotic, and anxiolytic medication as absent = 0, low = 1, or high = 2. For antidepressants and mood stabilizers, we converted each medication into low- or high-dose groupings using previously employed approach (2-4). Individuals on Levels 1 and 2 of these criteria were coded as low dose, and those with Levels 3 and 4 as high dose. We added a no-dose subtype for those not taking these medications. The antipsychotic doses were converted into chlorpromazine dose equivalents and were coded as 0, 1, or 2, for no medication, chlorpromazine equivalents dose equal or below, or above the mean effective daily dose (ED50) of chlorpromazine as defined by Davis and Chen (5). The chlorpromazine dose equivalents were calculated by R package “chlorpromazineR”. Alprazolam and lorazepam doses were similarly coded as 0, 1, or 2, concerning the midpoint of the Physician's Desk Reference recommended daily dose range. A composite measure of the total medication load was generated, reflecting the dose and variety of different medications taken, by summing all individual medication codes for each medication category for each participant with BDII-D.

***3. Inflammatory Cytokine Measures***

Blood was collected the day after psychiatric admission by nurses on the ward at 8:00 am and the samples were sent for testing daily to the Department of Laboratory Medicine of West China Hospital. To extract serum, the blood was allowed to clot for 30 minutes and then was centrifuged at 1000g for 5 minutes. IL-6 was measured using an electrochemiluminescence immunoassay (Roche Diagnostics, Rotkreuz, Zug, Switzerland). IL-1β and TNF-α were measured using chemiluminescence analysis (Siemens, Erlangen, Bavaria). CRP was measured using a scatteringimmune-turbidimetric assay (Beckman Coulter, Indianapolis, IN). Blood cell samples including the absolute value of the lymphocytes, monocytes, neutrophils, platelet, and WBC count were measured using routine laboratory methods with a Hitachi 7600 (Hitachi, Tokyo, Japan). The cytokine assays were conducted in triplicate. We calculated the Neutrophil-to-Lymphocyte (NTL) ratio, Monocyte-to-Lymphocyte (MTL) ratio, and Platelet-to-Lymphocyte (PTL) ratio to reflect a low-cost, stable, reproducible, and suitable routine biomarkers of systemic inflammation (6, 7).

***4.MRI data preprocessing***

The 3D T1-weighted images were preprocessed using FreeSurfer 6.0 implemented in the human connectome project (HCP) pipeline as described in our previous study(8). The fMRI preprocessing procedure followed the Human Connectome Project (HCP) minimal preprocessing pipeline (9), which includes fMRI volume and surface pipeline. It requires the completion of the HCP structural pipeline. The fMRI volume pipeline includes the following steps: removes spatial distortions, realigns volumes to compensate for subject motion, registers the fMRI data to the structural, reduces the bias field, normalizes the 4D image to a global mean, and masks the data with the final brain mask. The fMRISurface pipeline is to bring the time series from the volume into the CIFTI gray ordinates standard space. This is accomplished by mapping the voxels within the cortical grey matter ribbon onto the native cortical surface, transforming them according to the surface registration onto the 32k Conte69 mesh, and mapping the set of subcortical grey matter voxels from each subcortical parcel in each individual to a standard set of voxels in each atlas parcel.

***5. Partial correlation analysis***

Since there are no missing values in this dataset, the degree of freedom (df) for the partial correlation analyses of BDII-D is 141, and for HCs is 144. The df was calculated using the following formula:

df=n−k−2

where n is the sample size and k is the number of covariable. In partial correlation analysis, typically two degrees of freedom are used per analysis, hence subtracting 2.

The number of independent tests in the multiple comparison corrections were calculated in BDII-D and HCs group, respectively. In BDII-D group, significant changed FC were corrected for multiple comparisons with each of the following sets of factors, respectively: i) IL-1β (with hypothesis), ii) other peripheral inflammatory cytokines (including IL6, TNF-α, and CRP); ii) indirect inflammatory measures (including WBC, NTL ratio, MTL ratio, and PTL); iii) psychiatric symptoms and severity of suicide ideation were tested independently (including HAMD, HAMA, PANSS, C-SSRS); iv) clinical profiles (hypomanic episode frequency, duration of depressive episodes, illness duration, and age of onset); v) childhood maltreatment (CTQ) and CTQ subscores; vi) circadian rhythm scores (MEQ, ESS, and PSQI), and vii) BRIAN and its subscales.

Similarity, in HCs group, significant differed FC were corrected for multiple comparisons with each of the following sets of factors respectively: i) childhood maltreatment (CTQ), ii) circadian rhythm scores (MEQ, ESS, and PSQI), and iii) BRIAN and its subscales.

**Supplementary Tables**

| **Supplementary Table 1. Seed based FC differences between the BDII-D participants and the healthy controls** | | | | | | |
| --- | --- | --- | --- | --- | --- | --- |
| **Seeds** | **FC brain regions** | **MNI coordinates** | **Peak T values** | | **Cluster size** | **Cluster-level  *p* FDR corrected** |
| left caudate | right temporooccipital gyrus | 50, -58, 2 | | 4.5 | 200 | 0.000001 |
| left superior lateral occipital gyrus | -20, -66, 40 | | 4.6 | 57 | 0.017 |
| right precentral gyrus | 34, -6, 48 | | 4 | 45 | 0.036 |
| left anterior insula gyrus | -32, 10, 10 | | 4.7 | 40 | 0.046 |
| left middle frontal gyrus | left insula gyrus | -52, 8, 0 | | 4.3 | 63 | 0.01 |
| right superior lateral occipital gyrus | 40, -72, 26 | | -4.4 | 58 | 0.01 |
| right inferior frontal triangular gyrus | right superior frontal gyrus | 2, 14, 62 | | 4.4 | 56 | 0.017 |
| left superior frontal gyrus | -2, 14, 62 | | 4.1 |
| right medial superior frontal gyrus | posterior cingulate cortex | 2, -20, 25 | | -5.5 | 167 | 0.000022 |

**Abbreviations:** BDII-D-bipolar II depression; MNI- Montreal Neurological Institute; FDR- false discovery rate

| **Supplementary Table 2. Partial correlation analysis between significant VBM-based FC values and inflammation cytokines in BDII-D** | | | | | |
| --- | --- | --- | --- | --- | --- |
| **VBM FC** | **Correlation** | **IL-1β** | **TNF-α** | **IL-6** | **CRP** |
| Left caudate-rightTOG | Correlation r | -0.067 | -0.072 | -0.094 | 0.068 |
| *p value* | 0.429 | 0.395 | 0.268 | 0.42 |
| FDR corrected q value | 0.429 | 0.914 | 0.914 | 0.914 |
| Left caudate-left lateral SOG | Correlation r | -0.118 | 0.024 | -0.032 | 0.016 |
| *p value* | 0.16 | 0.777 | 0.703 | 0.846 |
| FDR corrected q value | 0.233 | 0.914 | 0.914 | 0.914 |
| Left caudate-right PCG | Correlation r | 0.181 | -0.144 | 0.047 | 0.023 |
| *p value* | 0.032 | 0.087 | 0.581 | 0.788 |
| FDR corrected q value | 0.098 | 0.782 | 0.914 | 0.914 |
| Left caudate-left insula gyrus | Correlation r | 0.236 | -0.018 | -0.076 | 0.02 |
| *p value* | 0.005 | 0.828 | 0.368 | 0.815 |
| FDR corrected q value | 0.042 | 0.914 | 0.914 | 0.914 |
| Left MFG-left insula | Correlation r | 0.123 | 0.057 | -0.019 | -0.03 |
| *p value* | 0.143 | 0.502 | 0.819 | 0.726 |
| FDR corrected q value | 0.233 | 0.914 | 0.914 | 0.914 |
| Left MFG-right lateral SOG | Correlation r | -0.113 | -0.057 | 0.103 | -0.004 |
| *p value* | 0.181 | 0.498 | 0.222 | 0.964 |
| FDR corrected q value | 0.233 | 0.914 | 0.914 | 0.964 |
| Right triangular IFG-right SFG | Correlation r | 0.162 | -0.058 | -0.179 | 0.212 |
| *p value* | 0.054 | 0.493 | 0.033 | 0.011 |
| FDR corrected q value | 0.121 | 0.914 | 0.441 | 0.31 |
| Right triangular IFG-left SFG | Correlation r | 0.088 | -0.058 | -0.024 | -0.024 |
| *p value* | 0.3 | 0.493 | 0.78 | 0.779 |
| FDR corrected q value | 0.337 | 0.914 | 0.914 | 0.914 |
| Right mSFG-PCC | Correlation r | 0.179 | -0.012 | -0.055 | -0.041 |
| *p value* | 0.033 | 0.884 | 0.514 | 0.63 |
| FDR corrected q value | 0.098 | 0.914 | 0.914 | 0.914 |

The number of independent tests between FC value IL-1β were 9 times, with other three inflammatory cytokines were 27 times. Controlled for age, sex, education, and medication load.
**Abbreviations:** BDII-D-bipolar II depression; VBM-voxel-based morphometry; FC-function connectivity; TOG-temporo-occipital gyrus; SOG-superior occipital gyrus; PCG- precentral gyrus; MFG-middle frontal gyrus; IFG -inferior frontal gyrus; SFG-superior frontal gyrus; mSFG-medial superior frontal gyrus; PCC-posterior cingulate gyrus

| **Supplementary Table 3. Partial correlation analysis between significant FC values and indirectly inflammation indicators in BDII-D** | | | | | |
| --- | --- | --- | --- | --- | --- |
| **VBM FC** | **Correlation** | **WBC** | **NTL** | **MTL** | **PTL** |
| Left caudate-right TOG | Correlation r | 0.018 | -0.064 | -0.014 | -0.222 |
| *p value* | 0.832 | 0.448 | 0.866 | 0.008 |
| FDR corrected q value | 0.98 | 0.979 | 0.98 | 0.29 |
| Left caudate-left lateral SOG | Correlation r | -0.051 | -0.083 | -0.087 | -0.175 |
| *p value* | 0.548 | 0.325 | 0.301 | 0.037 |
| FDR corrected q value | 0.979 | 0.929 | 0.929 | 0.672 |
| Left caudate-right PCG | Correlation r | 0.037 | 0.073 | -0.009 | 0.014 |
| *p value* | 0.662 | 0.387 | 0.918 | 0.871 |
| FDR corrected q value | 0.979 | 0.929 | 0.98 | 0.98 |
| Left caudate-left insula gyrus | Correlation r | 0.032 | 0.051 | -0.053 | 0.115 |
| *p value* | 0.707 | 0.551 | 0.528 | 0.175 |
| FDR corrected q value | 0.979 | 0.979 | 0.979 | 0.929 |
| Left MFG-left insula | Correlation r | 0.11 | 0.114 | 0.048 | -0.01 |
| *p value* | 0.191 | 0.178 | 0.574 | 0.903 |
| FDR corrected q value | 0.929 | 0.929 | 0.979 | 0.98 |
| Left MFG-right lateral SOG | Correlation r | -0.054 | -0.093 | -0.103 | -0.094 |
| *p value* | 0.526 | 0.273 | 0.222 | 0.267 |
| FDR corrected q value | 0.979 | 0.929 | 0.929 | 0.929 |
| Right triangular IFG-right SFG | Correlation r | 0.074 | -0.033 | 0.04 | -0.006 |
| *p value* | 0.383 | 0.692 | 0.633 | 0.943 |
| FDR corrected q value | 0.929 | 0.979 | 0.979 | 0.98 |
| Right triangular IFG-left SFG | Correlation r | 0.138 | 0.108 | 0.079 | -0.026 |
| *p value* | 0.102 | 0.201 | 0.349 | 0.762 |
| FDR corrected q value | 0.929 | 0.929 | 0.929 | 0.98 |
| Right mSFG-PCC | Correlation r | 0.013 | -0.034 | -0.005 | -0.001 |
| *p value* | 0.882 | 0.69 | 0.953 | 0.993 |
| FDR corrected q value | 0.98 | 0.979 | 0.98 | 0.993 |

The number of independent tests between FC value and indirectly inflammation indicators were 36 times. Controlled for age, sex, education, and medication load.
**Abbreviations:** BDII-D-bipolar II depression; VBM-voxel-based morphometry; FC-function connectivity; TOG-temporo-occipital gyrus; SOG-superior occipital gyrus; PCG- precentral gyrus; MFG-middle frontal gyrus; IFG -inferior frontal gyrus; SFG-superior frontal gyrus; mSFG-medial superior frontal gyrus; PCC-posterior cingulate gyrus; WBC-white blood cell; NTL-neutrophil-to-lymphocyte, MTL-monocyte-to-lymphocyte, PTL-platelet-to-lymphocyte

| **Supplementary Table 4. Partial correlation analysis between significant VBM-based FC values and PANSS in BDII-D** | | | | | |
| --- | --- | --- | --- | --- | --- |
| **VBM FC** | **Correlation** | **PANSS_P** | **PANSS_N** | **PANSS_G** | **PANSS_T** |
| Left caudate-right TOG | Correlation r | -0.097 | 0.077 | 0.129 | 0.057 |
| *p value* | 0.249 | 0.361 | 0.127 | 0.501 |
| FDR corrected q value | 0.654 | 0.654 | 0.651 | 0.759 |
| Left caudate-left lateral SOG | Correlation r | 0.043 | 0.154 | 0.169 | 0.186 |
| *p value* | 0.612 | 0.067 | 0.044 | 0.027 |
| FDR corrected q value | 0.759 | 0.403 | 0.377 | 0.377 |
| Left caudate-right PCG | Correlation r | 0.028 | -0.043 | -0.061 | -0.047 |
| *p value* | 0.737 | 0.615 | 0.471 | 0.576 |
| FDR corrected q value | 0.829 | 0.759 | 0.759 | 0.759 |
| Left caudate-left insula gyrus | Correlation r | 0.163 | 0.011 | 0.084 | 0.116 |
| *p value* | 0.052 | 0.895 | 0.318 | 0.169 |
| FDR corrected q value | 0.377 | 0.921 | 0.654 | 0.654 |
| Left MFG-left insula | Correlation r | -0.082 | 0.019 | 0.008 | -0.015 |
| *p value* | 0.331 | 0.82 | 0.927 | 0.856 |
| FDR corrected q value | 0.654 | 0.895 | 0.927 | 0.906 |
| Left MFG-right lateral SOG | Correlation r | -0.29 | -0.035 | -0.102 | -0.18 |
| *p value* | 4.60E-04 | 0.679 | 0.225 | 0.032 |
| FDR corrected q value | 0.017 | 0.788 | 0.654 | 0.377 |
| Right triangular IFG-right SFG | Correlation r | 0.055 | 0.1 | 0.04 | 0.084 |
| *p value* | 0.513 | 0.234 | 0.632 | 0.323 |
| FDR corrected q value | 0.759 | 0.654 | 0.759 | 0.654 |
| Right triangular IFG-left SFG | Correlation r | 0.048 | -0.077 | -0.043 | -0.047 |
| *p value* | 0.569 | 0.363 | 0.611 | 0.576 |
| FDR corrected q value | 0.759 | 0.654 | 0.759 | 0.759 |
| Right mSFG-PCC | Correlation r | 0.106 | -0.089 | 0.081 | 0.057 |
| *p value* | 0.21 | 0.29 | 0.336 | 0.501 |
| FDR corrected q value | 0.654 | 0.654 | 0.654 | 0.759 |

The number of independent tests between FC value and PANSS scores were 36 times. Controlled for age, sex, education, and medication load.

**Abbreviations:** BDII-D-bipolar II depression; VBM-voxel-based morphometry; FC-function connectivity; TOG-temporo-occipital gyrus; SOG-superior occipital gyrus; PCG- precentral gyrus; MFG-middle frontal gyrus; IFG -inferior frontal gyrus; SFG-superior frontal gyrus; mSFG-medial superior frontal gyrus; PCC-posterior cingulate gyrus; PANSS- Positive and Negative Syndrome Scale; N-negative; P-positive; G-general; T-total.

| **Supplementary Table 5. Partial correlation analysis between significant VBM-based FC values and clinical symptoms in BDII-D** | | | | |
| --- | --- | --- | --- | --- |
| **VBM FC** | **Correlation** | **HAMD** | **HAMA** | **C-SSRS** |
| Left caudate-rightTOG | Correlation r | -0.031 | 0.122 | 0.034 |
| *p value* | 0.712 | 0.148 | 0.691 |
| FDR corrected q value | 0.712 | 0.445 | 0.908 |
| Left caudate-left lateral SOG | Correlation r | 0.1 | 0.02 | 0.01 |
| *p value* | 0.237 | 0.813 | 0.908 |
| FDR corrected q value | 0.305 | 0.882 | 0.908 |
| Left caudate-right PCG | Correlation r | 0.116 | -0.197 | -0.156 |
| *p value* | 0.17 | 0.019 | 0.063 |
| FDR corrected q value | 0.255 | 0.169 | 0.283 |
| Left caudate-left insula gyrus | Correlation r | 0.338 | 0.075 | -0.013 |
| *p value* | 3.86E-05 | 0.374 | 0.878 |
| FDR corrected q value | 3.47-04 | 0.525 | 0.908 |
| Left MFG-left insula | Correlation r | 0.072 | 0.013 | 0.06 |
| *p value* | 0.396 | 0.882 | 0.478 |
| FDR corrected q value | 0.446 | 0.882 | 0.908 |
| Left MFG-right lateral SOG | Correlation r | -0.135 | -0.09 | -0.039 |
| *p value* | 0.108 | 0.285 | 0.641 |
| FDR corrected q value | 0.195 | 0.525 | 0.908 |
| Right triangular IFG-right SFG | Correlation r | 0.284 | 0.082 | 0.166 |
| *p value* | 0.001 | 0.334 | 0.048 |
| FDR corrected q value | 0.002 | 0.525 | 0.283 |
| Right triangular IFG-left SFG | Correlation r | 0.215 | 0.17 | 0.1 |
| *p value* | 0.01 | 0.043 | 0.236 |
| FDR corrected q value | 0.023 | 0.194 | 0.708 |
| Right mSFG-PCC | Correlation r | 0.298 | 0.07 | 0.012 |
| *p value* | 3.17E-04 | 0.408 | 0.889 |
| FDR corrected q value | 0.001 | 0.525 | 0.908 |

The number of independent tests between FC values and HAMD, HAMD, and C-SSRS were 9 times, respectively. Controlled for age, sex, education, and medication load.

**Abbreviations:** BDII-D-bipolar II depression; VBM-voxel-based morphometry; FC-function connectivity; TOG-temporo-occipital gyrus; SOG-superior occipital gyrus; PCG- precentral gyrus; MFG-middle frontal gyrus; IFG-inferior frontal gyrus; SFG-superior frontal gyrus; mSFG-medial superior frontal gyrus; PCC-posterior cingulate gyrus; HAMD-17-item Hamilton Depression Scale; HAMA-Hamilton Anxiety Scale; C-SSRS -Columbia-Suicide Severity Rating Scale

| **Supplementary Table 6. Partial correlation analysis between significant VBM-based FC values and clinical profiles in BDII-D** | | | | | | |
| --- | --- | --- | --- | --- | --- | --- |
| **VBM FC** | **Correlation** | **BD diagnose age** | **Age at onset** | **Illness duration** | **Duration  of depressive episode** | **Number of hypomanic** |
| Left caudate-rightTOG | Correlation r | 0.011 | -0.01 | 0.045 | 0.121 | -0.014 |
| *p value* | 0.898 | 0.902 | 0.598 | 0.151 | 0.868 |
| FDR corrected q value | 0.944 | 0.944 | 0.892 | 0.617 | 0.944 |
| Left caudate-left lateral SOG | Correlation r | 0.023 | -0.141 | 0.125 | 0.192 | -0.122 |
| *p value* | 0.79 | 0.094 | 0.137 | 0.022 | 0.147 |
| FDR corrected q value | 0.944 | 0.617 | 0.617 | 0.495 | 0.617 |
| Left caudate-right PCG | Correlation r | 0.129 | -0.06 | 0.038 | 0.016 | 0.072 |
| *p value* | 0.127 | 0.48 | 0.652 | 0.85 | 0.396 |
| FDR corrected q value | 0.617 | 0.8 | 0.901 | 0.944 | 0.8 |
| Left caudate-left insula gyrus | Correlation r | 0.078 | 0.092 | 0.043 | -0.07 | 0.151 |
| *p value* | 0.354 | 0.274 | 0.614 | 0.409 | 0.074 |
| FDR corrected q value | 0.8 | 0.8 | 0.892 | 0.8 | 0.617 |
| Left MFG-left insula | Correlation r | -0.125 | -0.048 | -0.064 | 0.06 | 0.018 |
| *p value* | 0.137 | 0.573 | 0.446 | 0.479 | 0.831 |
| FDR corrected q value | 0.617 | 0.889 | 0.8 | 0.8 | 0.944 |
| Left MFG-right lateral SOG | Correlation r | -0.082 | 0.032 | 0.063 | -0.011 | 0.014 |
| *p value* | 0.332 | 0.703 | 0.456 | 0.901 | 0.872 |
| FDR corrected q value | 0.8 | 0.904 | 0.8 | 0.944 | 0.944 |
| Right triangular IFG-right SFG | Correlation r | 0.105 | 0.053 | -0.005 | -0.124 | -0.083 |
| *p value* | 0.214 | 0.529 | 0.954 | 0.14 | 0.326 |
| FDR corrected q value | 0.8 | 0.85 | 0.958 | 0.617 | 0.8 |
| Right triangular IFG-left SFG | Correlation r | 0.097 | 0.215 | -0.067 | -0.123 | -0.004 |
| *p value* | 0.252 | 0.01 | 0.428 | 0.145 | 0.958 |
| FDR corrected q value | 0.8 | 0.454 | 0.8 | 0.617 | 0.958 |
| Right mSFG-PCC | Correlation r | -0.093 | -0.09 | 0.035 | -0.037 | 0.062 |
| *p value* | 0.274 | 0.285 | 0.683 | 0.661 | 0.464 |
| FDR corrected q value | 0.8 | 0.8 | 0.903 | 0.901 | 0.8 |

The number of independent tests between FC values and clinical profiles were 45 times. Controlled for age, sex, education, and medication load.

**Abbreviations:** BDII-D-bipolar II depression; VBM-voxel-based morphometry; FC-function connectivity; TOG-temporo-occipital gyrus; SOG-superior occipital gyrus; PCG- precentral gyrus; MFG-middle frontal gyrus; IFG -inferior frontal gyrus; SFG-superior frontal gyrus; mSFG-medial superior frontal gyrus; PCC-posterior cingulate gyrus

| **Supplementary Table 7. Partial correlation analysis between significant VBM-based FC values and CTQ in BDII-D** | | | | | | | |
| --- | --- | --- | --- | --- | --- | --- | --- |
| **VBM FC** | **Correlation** | **CTQ** | **EA** | **EN** | **PA** | **PN** | **SA** |
| Left caudate-rightTOG | Correlation r | -0.098 | -0.029 | -0.119 | 0.001 | -0.135 | -0.073 |
| *p value* | 0.248 | 0.735 | 0.158 | 0.991 | 0.11 | 0.39 |
| FDR corrected q value | 0.596 | 0.964 | 0.721 | 0.991 | 0.721 | 0.798 |
| Left caudate-left lateral SOG | Correlation r | -0.082 | -0.096 | -0.094 | -0.007 | -0.087 | 0.029 |
| *p value* | 0.331 | 0.255 | 0.267 | 0.939 | 0.304 | 0.728 |
| FDR corrected q value | 0.596 | 0.721 | 0.721 | 0.964 | 0.721 | 0.964 |
| Left caudate-right PCG | Correlation r | 0.051 | 0.007 | 0.07 | 0.034 | 0.061 | 0.013 |
| *p value* | 0.546 | 0.932 | 0.405 | 0.686 | 0.469 | 0.874 |
| FDR corrected q value | 0.645 | 0.964 | 0.798 | 0.964 | 0.844 | 0.964 |
| Left caudate-left insula gyrus | Correlation r | 0.169 | 0.112 | 0.117 | 0.066 | 0.224 | 0.153 |
| *p value* | 0.045 | 0.184 | 0.166 | 0.436 | 0.007 | 0.069 |
| FDR corrected q value | 0.404 | 0.721 | 0.721 | 0.817 | 0.329 | 0.721 |
| Left MFG-left insula | Correlation r | 0.086 | 0.092 | 0.089 | 0.075 | 0.114 | -0.104 |
| *p value* | 0.311 | 0.277 | 0.29 | 0.376 | 0.176 | 0.22 |
| FDR corrected q value | 0.596 | 0.721 | 0.721 | 0.798 | 0.721 | 0.721 |
| Left MFG-right lateral SOG | Correlation r | -0.048 | -0.01 | -0.024 | -0.023 | -0.096 | -0.052 |
| *p value* | 0.573 | 0.902 | 0.774 | 0.79 | 0.256 | 0.542 |
| FDR corrected q value | 0.645 | 0.964 | 0.964 | 0.964 | 0.721 | 0.88 |
| Right triangular IFG-right SFG | Correlation r | 0.05 | -0.033 | 0.051 | -0.01 | 0.105 | 0.106 |
| *p value* | 0.555 | 0.701 | 0.548 | 0.904 | 0.215 | 0.209 |
| FDR corrected q value | 0.645 | 0.964 | 0.88 | 0.964 | 0.721 | 0.721 |
| Right triangular IFG-left SFG | Correlation r | 0.024 | -0.006 | 0.006 | 0.019 | 0.035 | 0.07 |
| *p value* | 0.781 | 0.943 | 0.94 | 0.822 | 0.682 | 0.408 |
| FDR corrected q value | 0.781 | 0.964 | 0.964 | 0.964 | 0.964 | 0.798 |
| Right mSFG-PCC | Correlation r | 0.125 | 0.18 | 0.125 | 0.031 | 0.118 | -0.058 |
| *p value* | 0.138 | 0.032 | 0.139 | 0.716 | 0.163 | 0.491 |
| FDR corrected q value | 0.596 | 0.721 | 0.721 | 0.964 | 0.721 | 0.85 |

The number of independent tests between FC values and CTQ score were 9 times, and for CTQ subscales were 45 times. Controlled for age, sex, education, and medication load.

**Abbreviations:** BDII-D-bipolar II depression; HC-health control; VBM-voxel-based morphometry; FC-function connectivity; TOG-temporo-occipital gyrus; SOG-superior occipital gyrus; PCG- precentral gyrus; MFG-middle frontal gyrus; IFG -inferior frontal gyrus; SFG-superior frontal gyrus; mSFG-medial superior frontal gyrus; PCC-posterior cingulate gyrus; CTQ-Childhood Trauma Questionnaire; EA-emotional abuse; EN-emotional neglect; PA-physical abuse; PN-physical neglect; SA-sexual abuse

| **Supplementary Table 8. Partial correlation analysis between significant VBM FC values and circadian rhythm BDII-D** | | | | |
| --- | --- | --- | --- | --- |
| **VBM FC** | **Correlation** | **PSQI** | **MEQ** | **ESS** |
| Left caudate-rightTOG | Correlation r | -0.007 | 0.069 | -0.008 |
| *p value* | 0.936 | 0.413 | 0.929 |
| FDR corrected q value | 0.936 | 0.743 | 0.929 |
| Left caudate-left lateral SOG | Correlation r | 0.036 | 0.106 | 0.198 |
| *p value* | 0.672 | 0.208 | 0.018 |
| FDR corrected q value | 0.936 | 0.736 | 0.149 |
| Left caudate-right PCG | Correlation r | -0.083 | -0.023 | 0.035 |
| *p value* | 0.328 | 0.79 | 0.681 |
| FDR corrected q value | 0.936 | 0.952 | 0.929 |
| Left caudate-left insula gyrus | Correlation r | -0.082 | 0.119 | -0.052 |
| *p value* | 0.332 | 0.16 | 0.535 |
| FDR corrected q value | 0.936 | 0.736 | 0.929 |
| Left MFG-left insula | Correlation r | -0.047 | -0.02 | -0.179 |
| *p value* | 0.577 | 0.817 | 0.033 |
| FDR corrected q value | 0.936 | 0.952 | 0.149 |
| Left MFG-right lateral SOG | Correlation r | -0.063 | -0.083 | -0.031 |
| *p value* | 0.458 | 0.327 | 0.713 |
| FDR corrected q value | 0.936 | 0.736 | 0.929 |
| Right triangular IFG-right SFG | Correlation r | -0.062 | -0.015 | -0.013 |
| *p value* | 0.465 | 0.858 | 0.882 |
| FDR corrected q value | 0.936 | 0.952 | 0.929 |
| Right triangular IFG-left SFG | Correlation r | -0.009 | -0.023 | 0.062 |
| *p value* | 0.919 | 0.79 | 0.465 |
| FDR corrected q value | 0.936 | 0.952 | 0.929 |
| Right mSFG-PCC | Correlation r | 0.009 | 0.095 | -0.01 |
| *p value* | 0.916 | 0.263 | 0.907 |
| FDR corrected q value | 0.936 | 0.736 | 0.929 |

The number of independent tests between FC values and PSQI, MEQ, ESS were 9 times, respectively. Controlled for age, sex, education, and medication load.

**Abbreviations:** BDII-D-bipolar II depression; VBM-voxel-based morphometry; FC-function connectivity; TOG-temporo-occipital gyrus; SOG-superior occipital gyrus; PCG- precentral gyrus; MFG-middle frontal gyrus; IFG -inferior frontal gyrus; SFG-superior frontal gyrus; mSFG-medial superior frontal gyrus; PCC-posterior cingulate gyrus; MEQ-Morninness-Eveningness Questionnaire, ESS-Epworth Sleepiness Scale, PSQI-Pittsburgh Sleep Quality Index

| **Supplementary Table 9. Partial correlation analysis between significant VBM-based FC values and BRIAN score in BDII-D** | | | | | | | | |
| --- | --- | --- | --- | --- | --- | --- | --- | --- |
| **VBM FC** | **Correlation** | **BRIAN** | **Activities** | **Eating pattern** | **Predominant rhythm** | **Sleep** | | **Social rhythm** | |
| Left caudate-rightTOG | Correlation r | -0.057 | -0.067 | -0.068 | 0.137 | -0.097 | -0.08 | |
| *p value* | 0.498 | 0.43 | 0.422 | 0.105 | 0.253 | 0.346 | |
| FDR corrected q value | 0.854 | 0.58 | 0.58 | 0.558 | 0.564 | 0.567 | |
| Left caudate-left lateral SOG | Correlation r | 0.022 | 0.004 | -0.046 | 0.091 | -0.067 | -0.012 | |
| *p value* | 0.791 | 0.964 | 0.586 | 0.283 | 0.427 | 0.892 | |
| FDR corrected q value | 0.89 | 0.986 | 0.713 | 0.567 | 0.58 | 0.955 | |
| Left caudate-right PCG | Correlation r | -0.166 | -0.165 | -0.1 | -0.15 | 0.016 | -0.182 | |
| *p value* | 0.048 | 0.049 | 0.235 | 0.075 | 0.853 | 0.03 | |
| FDR corrected q value | 0.209 | 0.548 | 0.558 | 0.558 | 0.955 | 0.548 | |
| Left caudate-left insula gyrus | Correlation r | -0.157 | -0.184 | -0.066 | -0.109 | -0.076 | -0.095 | |
| *p value* | 0.063 | 0.028 | 0.438 | 0.196 | 0.366 | 0.263 | |
| FDR corrected q value | 0.209 | 0.548 | 0.58 | 0.558 | 0.567 | 0.564 | |
| Left MFG-left insula | Correlation r | -0.153 | -0.107 | -0.169 | -0.027 | -0.067 | -0.158 | |
| *p value* | 0.07 | 0.206 | 0.044 | 0.748 | 0.427 | 0.061 | |
| FDR corrected q value | 0.209 | 0.558 | 0.548 | 0.863 | 0.58 | 0.548 | |
| Left MFG-right lateral SOG | Correlation r | 0.011 | 0.04 | 0.076 | 0.11 | -0.086 | -0.101 | |
| *p value* | 0.898 | 0.635 | 0.368 | 0.191 | 0.31 | 0.231 | |
| FDR corrected q value | 0.898 | 0.752 | 0.567 | 0.558 | 0.567 | 0.558 | |
| Right triangular IFG-right SFG | Correlation r | -0.048 | -0.075 | 0.125 | -0.1 | -0.106 | -0.006 | |
| *p value* | 0.57 | 0.378 | 0.138 | 0.236 | 0.21 | 0.944 | |
| FDR corrected q value | 0.854 | 0.567 | 0.558 | 0.558 | 0.558 | 0.986 | |
| Right triangular IFG-left SFG | Correlation r | 0.032 | 1.74E-04 | 0.106 | 0.012 | -0.078 | 0.085 | |
| *p value* | 0.702 | 0.998 | 0.208 | 0.887 | 0.353 | 0.315 | |
| FDR corrected q value | 0.89 | 0.998 | 0.558 | 0.955 | 0.567 | 0.567 | |
| Right mSFG-PCC | Correlation r | -0.1 | -0.127 | -0.129 | -0.117 | 0.082 | -0.058 | |
| *p value* | 0.235 | 0.133 | 0.126 | 0.165 | 0.332 | 0.495 | |
| FDR corrected q value | 0.528 | 0.558 | 0.558 | 0.558 | 0.567 | 0.637 | |

The number of independent tests between FC values and BRIAN score were 9 times, and for BRIAN subscales were 45 times. Controlled for age, sex, education, and medication load.

**Abbreviations:** BDII-D-bipolar II depression; VBM-voxel-based morphometry; FC-function connectivity; TOG-temporo-occipital gyrus; SOG-superior occipital gyrus; PCG- precentral gyrus; MFG-middle frontal gyrus; IFG -inferior frontal gyrus; SFG-superior frontal gyrus; mSFG-medial superior frontal gyrus; PCC-posterior cingulate gyrus; BRIAN-Biological Rhythms Interview of Assessment in Neuropsychiatry

| **Supplementary Table 10. Partial correlation analysis between significant VBM FC values and CTQ in HC** | | | | | | | |
| --- | --- | --- | --- | --- | --- | --- | --- |
| **VBM FC** | **Correlation** | **CTQ** | **EA** | **EN** | **PA** | **PN** | **SA** |
| Left caudate-rightTOG | Correlation r | 0.085 | 0.104 | 0.083 | 0.026 | 0.045 | -0.011 |
| *p value* | 0.305 | 0.212 | 0.317 | 0.75 | 0.587 | 0.895 |
| FDR corrected q value | 0.858 | 0.853 | 0.853 | 0.965 | 0.944 | 0.965 |
| Left caudate-left lateral SOG | Correlation r | -0.025 | -0.058 | 0.006 | -0.02 | -0.059 | 0.049 |
| *p value* | 0.763 | 0.483 | 0.946 | 0.851 | 0.476 | 0.552 |
| FDR corrected q value | 0.858 | 0.921 | 0.968 | 0.965 | 0.921 | 0.921 |
| Left caudate-right PCG | Correlation r | -0.043 | -0.066 | -0.016 | 0.031 | -0.069 | -0.083 |
| *p value* | 0.601 | 0.426 | 0.846 | 0.711 | 0.407 | 0.318 |
| FDR corrected q value | 0.858 | 0.913 | 0.965 | 0.965 | 0.913 | 0.853 |
| Left caudate-left insula gyrus | Correlation r | 0.048 | 0.015 | 0.092 | 0.05 | -0.052 | -0.009 |
| *p value* | 0.563 | 0.86 | 0.266 | 0.544 | 0.528 | 0.91 |
| FDR corrected q value | 0.858 | 0.965 | 0.853 | 0.921 | 0.921 | 0.965 |
| Left MFG-left insula | Correlation r | -0.011 | 0.029 | -0.009 | -0.09 | 0.009 | -0.012 |
| *p value* | 0.896 | 0.725 | 0.915 | 0.304 | 0.911 | 0.883 |
| FDR corrected q value | 0.896 | 0.965 | 0.965 | 0.853 | 0.965 | 0.965 |
| Left MFG-right lateral SOG | Correlation r | 0.22 | 0.124 | 0.215 | 0.147 | 0.175 | 0.082 |
| *p value* | 0.007 | 0.135 | 0.009 | 0.075 | 0.034 | 0.322 |
| FDR corrected q value | 0.067 | 0.761 | 0.333 | 0.562 | 0.435 | 0.853 |
| Right triangular IFG-right SFG | Correlation r | 0.051 | -0.012 | -0.016 | 0.105 | 0.115 | 0.201 |
| *p value* | 0.54 | 0.881 | 0.849 | 0.205 | 0.164 | 0.015 |
| FDR corrected q value | 0.858 | 0.965 | 0.965 | 0.853 | 0.82 | 0.333 |
| Right triangular IFG-left SFG | Correlation r | 0.13 | 0.084 | 0.067 | 0.131 | 0.151 | 0.171 |
| *p value* | 0.115 | 0.313 | 0.419 | 0.114 | 0.067 | 0.039 |
| FDR corrected q value | 0.519 | 0.853 | 0.913 | 0.732 | 0.562 | 0.435 |
| Right mSFG-PCC | Correlation r | -0.029 | -0.077 | -0.003 | -0.01 | -0.043 | 0.055 |
| *p value* | 0.729 | 0.356 | 0.969 | 0.922 | 0.609 | 0.511 |
| FDR corrected q value | 0.858 | 0.89 | 0.969 | 0.965 | 0.945 | 0.921 |

The number of independent tests between FC values and CTQ score were 9 times, and for CTQ subscales were 45 times. Controlled for age, sex, education, and medication load.

**Abbreviations:** BDII-D-bipolar II depression; HC-health cpntrol; VBM-voxel-based morphometry; FC-function connectivity; TOG-temporo-occipital gyrus; SOG-superior occipital gyrus; PCG- precentral gyrus; MFG-middle frontal gyrus; IFG -inferior frontal gyrus; SFG-superior frontal gyrus; mSFG-medial superior frontal gyrus; PCC-posterior cingulate gyrus; CTQ-Childhood Trauma Questionnaire; EA-emotional abuse; EN-emotional neglect; PA-physical abuse; PN-physical neglect; SA-sexual abuse

| **Supplementary Table 11. Partial correlation analysis between significant VBM FC values and BRIAN in HC** | | | | | | | |
| --- | --- | --- | --- | --- | --- | --- | --- |
| **VBM FC** | **Correlation** | **Brian** | **Activities** | **Eating pattern** | **Predominant rhythm** | **Sleep** | **Social rhythm** |
| Left caudate-rightTOG | Correlation r | 0.091 | 0.059 | 0.139 | -0.026 | 0.073 | 0.058 |
| *p value* | 0.273 | 0.476 | 0.094 | 0.754 | 0.382 | 0.488 |
| FDR corrected q value | 0.526 | 0.871 | 0.602 | 0.871 | 0.871 | 0.871 |
| Left caudate-left lateral SOG | Correlation r | 0.053 | 0.04 | 0.147 | -0.064 | -0.009 | 0.096 |
| *p value* | 0.526 | 0.626 | 0.076 | 0.442 | 0.91 | 0.247 |
| FDR corrected q value | 0.789 | 0.871 | 0.572 | 0.871 | 0.91 | 0.871 |
| Left caudate-right PCG | Correlation r | -0.13 | -0.022 | -0.019 | -0.211 | -0.157 | 0.045 |
| *p value* | 0.117 | 0.789 | 0.819 | 0.01 | 0.057 | 0.586 |
| FDR corrected q value | 0.526 | 0.871 | 0.875 | 0.47 | 0.512 | 0.871 |
| Left caudate-left insula gyrus | Correlation r | -0.101 | -0.095 | -0.026 | -0.056 | -0.024 | -0.166 |
| *p value* | 0.222 | 0.252 | 0.754 | 0.499 | 0.771 | 0.045 |
| FDR corrected q value | 0.526 | 0.871 | 0.871 | 0.871 | 0.871 | 0.508 |
| Left MFG-left insula | Correlation r | -0.118 | -0.175 | 0.028 | -0.05 | -0.071 | -0.132 |
| *p value* | 0.156 | 0.034 | 0.738 | 0.546 | 0.39 | 0.112 |
| FDR corrected q value | 0.526 | 0.508 | 0.871 | 0.871 | 0.871 | 0.627 |
| Left MFG-right lateral SOG | Correlation r | 0.012 | -0.039 | 0.059 | 0.025 | 0.035 | -0.066 |
| *p value* | 0.888 | 0.636 | 0.478 | 0.765 | 0.673 | 0.424 |
| FDR corrected q value | 0.888 | 0.871 | 0.871 | 0.871 | 0.871 | 0.871 |
| Right triangular IFG-right SFG | Correlation r | -0.087 | -0.022 | -0.06 | -0.107 | 0.028 | -0.174 |
| *p value* | 0.292 | 0.794 | 0.47 | 0.196 | 0.732 | 0.035 |
| FDR corrected q value | 0.526 | 0.871 | 0.871 | 0.871 | 0.871 | 0.508 |
| Right triangular IFG-left SFG | Correlation r | -0.016 | -0.053 | -0.039 | 0.041 | 0.033 | -0.064 |
| *p value* | 0.852 | 0.528 | 0.641 | 0.624 | 0.691 | 0.445 |
| FDR corrected q value | 0.888 | 0.871 | 0.871 | 0.871 | 0.871 | 0.871 |
| Right mSFG-PCC | Correlation r | -0.038 | -0.069 | -0.024 | 0.015 | -0.016 | -0.038 |
| *p value* | 0.651 | 0.405 | 0.776 | 0.856 | 0.843 | 0.647 |
| FDR corrected q value | 0.838 | 0.871 | 0.871 | 0.875 | 0.875 | 0.871 |

The number of independent tests between FC values and BRIAN score were 9 times, and for BRIAN subscales were 45 times. Controlled for age, sex, education, and medication load.

**Abbreviations:** BDII-D-bipolar II depression; HC-health control; VBM-voxel-based morphometry; FC-function connectivity; TOG-temporo-occipital gyrus; SOG-superior occipital gyrus; PCG- precentral gyrus; MFG-middle frontal gyrus; IFG -inferior frontal gyrus; SFG-superior frontal gyrus; mSFG-medial superior frontal gyrus; PCC-posterior cingulate gyrus; FDR-false discovery rate; BRIAN-Biological Rhythms Interview of Assessment in Neuropsychiatry

| **Supplementary Table 12. Partial correlation analysis between significant VBM-based FC values and sleep-circadian rhythm in HCs** | | | | |
| --- | --- | --- | --- | --- |
| **VBM FC** | **Correlation** | **PSQI** | **MEQ** | **ESS** |
| Left caudate-rightTOG | Correlation r | -0.083 | 0.076 | -0.018 |
| *p value* | 0.315 | 0.358 | 0.832 |
| FDR corrected q value | 0.553 | 0.961 | 0.881 |
| Left caudate-left lateral SOG | Correlation r | 0.03 | -0.052 | 0.079 |
| *p value* | 0.721 | 0.534 | 0.341 |
| FDR corrected q value | 0.811 | 0.961 | 0.614 |
| Left caudate-right PCG | Correlation r | -0.077 | 0.03 | -0.111 |
| *p value* | 0.353 | 0.718 | 0.179 |
| FDR corrected q value | 0.553 | 0.986 | 0.565 |
| Left caudate-left insula gyrus | Correlation r | -0.151 | 0.023 | -0.109 |
| *p value* | 0.069 | 0.779 | 0.188 |
| FDR corrected q value | 0.31 | 0.986 | 0.565 |
| Left MFG-left insula | Correlation r | -0.076 | 0.086 | -0.012 |
| *p value* | 0.362 | 0.301 | 0.881 |
| FDR corrected q value | 0.553 | 0.961 | 0.881 |
| Left MFG-right lateral SOG | Correlation r | 0.013 | -0.002 | 0.091 |
| *p value* | 0.877 | 0.986 | 0.274 |
| FDR corrected q value | 0.877 | 0.986 | 0.614 |
| Right triangular IFG-right SFG | Correlation r | 0.045 | 0.053 | 0.025 |
| *p value* | 0.589 | 0.521 | 0.759 |
| FDR corrected q value | 0.758 | 0.961 | 0.881 |
| Right triangular IFG-left SFG | Correlation r | 0.075 | 0.006 | 0.115 |
| *p value* | 0.369 | 0.941 | 0.166 |
| FDR corrected q value | 0.553 | 0.986 | 0.565 |
| Right mSFG-PCC | Correlation r | -0.151 | -0.127 | -0.055 |
| *p value* | 0.068 | 0.125 | 0.51 |
| FDR corrected q value | 0.31 | 0.961 | 0.765 |

The number of independent tests between FC values and PSQI, MEQ, ESS were 9 times, respectively. Controlled for age, sex, education, and medication load.

**Abbreviations:** BDII-D-bipolar II depression; HC-health controls; VBM-voxel-based morphometry; FC-function connectivity; TOG-temporo-occipital gyrus; SOG-superior occipital gyrus; PCG- precentral gyrus; MFG-middle frontal gyrus; IFG -inferior frontal gyrus; SFG-superior frontal gyrus; mSFG-medial superior frontal gyrus; PCC-posterior cingulate gyrus; FDR-false discovery rate; MEQ-Morninness-Eveningness Questionnaire, ESS-Epworth Sleepiness Scale, PSQI-Pittsburgh Sleep Quality Index

**Supplementary Figure 1**


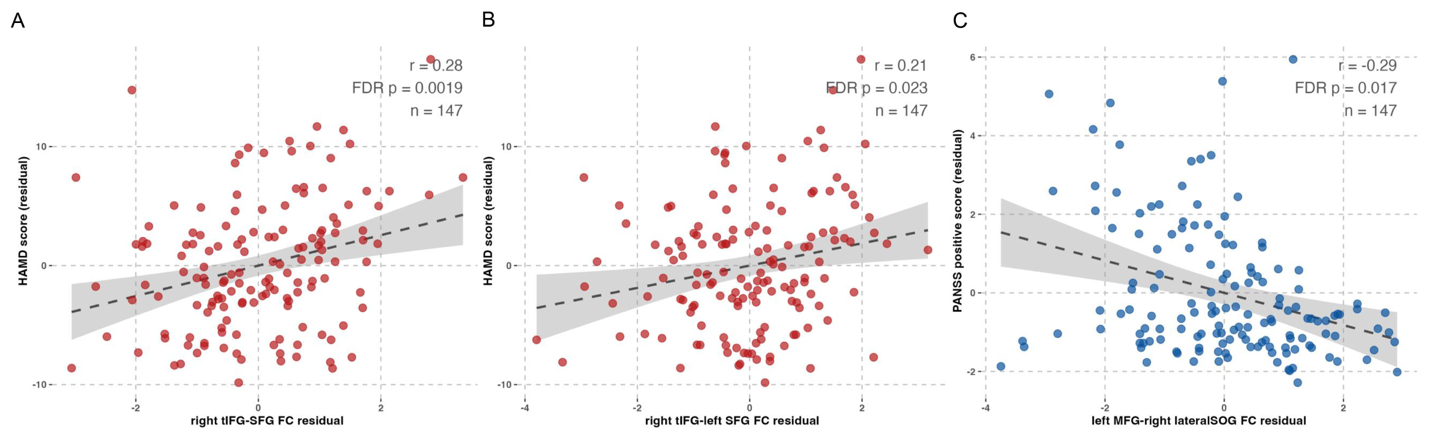


**Supplementary Figure 1.** Partial correlation between altered functional connectivity (FC) and psychiatric symptoms in BDII-D. (A) higher FC value between right triangular inferior frontal gyrus (tIFG)-superior frontal gyrus (SFG) was significantly related to higher HAMD scores; (B) higher FC value between right tIFG-left SFG was significantly related to higher HAMD scores; (C) lower FC value between left middle frontal gyrus-right lateral superior occipital gyrus was significantly associated with higher PANSS positive score.

**Abbreviations:** BDII-D-bipolar II depression; HAMD-17-item Hamilton Depression Scale; PANSS-Positive and Negative Syndrome Scale.

**Reference**

1. Hassel S, Almeida JR, Kerr N, Nau S, Ladouceur CD, Fissell K, Kupfer DJ, Phillips ML. Elevated striatal and decreased dorsolateral prefrontal cortical activity in response to emotional stimuli in euthymic bipolar disorder: no associations with psychotropic medication load. Bipolar disorders. 2008;10:916-927.

2. Phillips ML, Travis MJ, Fagiolini A, Kupfer DJ. Medication effects in neuroimaging studies of bipolar disorder. The American journal of psychiatry. 2008;165:313-320.

3. Almeida JR, Akkal D, Hassel S, Travis MJ, Banihashemi L, Kerr N, Kupfer DJ, Phillips ML. Reduced gray matter volume in ventral prefrontal cortex but not amygdala in bipolar disorder: significant effects of gender and trait anxiety. Psychiatry research. 2009;171:54-68.

4. Sackeim HA. The definition and meaning of treatment-resistant depression. The Journal of clinical psychiatry. 2001;62 Suppl 16:10-17.

5. Davis JM, Chen N. Dose response and dose equivalence of antipsychotics. Journal of clinical psychopharmacology. 2004;24:192-208.

6. Mazza MG, Capellazzi M, Tagliabue I, Lucchi S, Rossetti A, Clerici M. Neutrophil-lymphocyte, monocyte-lymphocyte and platelet-lymphocyte ratio in schizoaffective disorder compared to schizophrenia. General hospital psychiatry. 2019;61:86-87.

7. Zahorec R. Ratio of neutrophil to lymphocyte counts--rapid and simple parameter of systemic inflammation and stress in critically ill. Bratislavske lekarske listy. 2001;102:5-14.

8. Cao Y, Lizano P, Deng G, Sun H, Zhou X, Xie H, Zhan Y, Mu J, Long X, Xiao H. Brain‐derived subgroups of bipolar II depression associate with inflammation and choroid plexus morphology. Psychiatry and Clinical Neurosciences. 2023;77:613-621.

9. Glasser MF, Sotiropoulos SN, Wilson JA, Coalson TS, Fischl B, Andersson JL, Xu J, Jbabdi S, Webster M, Polimeni JR. The minimal preprocessing pipelines for the Human Connectome Project. Neuroimage. 2013;80:105-124.
